# Supplementary material for: Effector Vδ1 γδ T cells mediate anti-tumor immunity and are reprogrammed by imatinib in human gastrointestinal stromal tumor
Source: Research Square preprint supplement (doi:10.21203/rs.3.rs-9557741/v1), 2026-06-01
Supplement: Supplementary file 1 [file 49480ea95109b557f1103270.pdf]

**Figure S1**

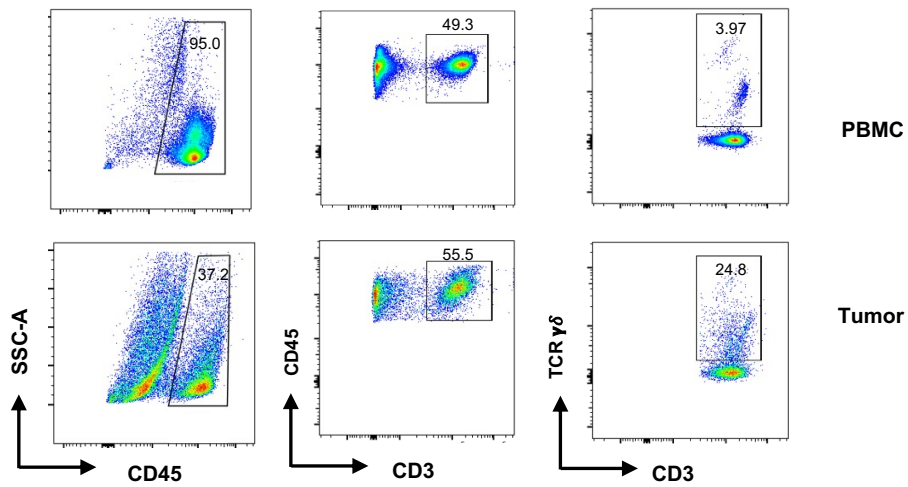

**Figure S1: Sorting  $\gamma\delta$  T cells from PBMC and tumor cell suspensions for scRNA-seq.** Flow cytometry showing sorting strategy to isolate live  $\gamma\delta$  T cells. After sorting, the cells with viability more than 80% were processed for 10x Genomics scRNA-seq.

Figure S2

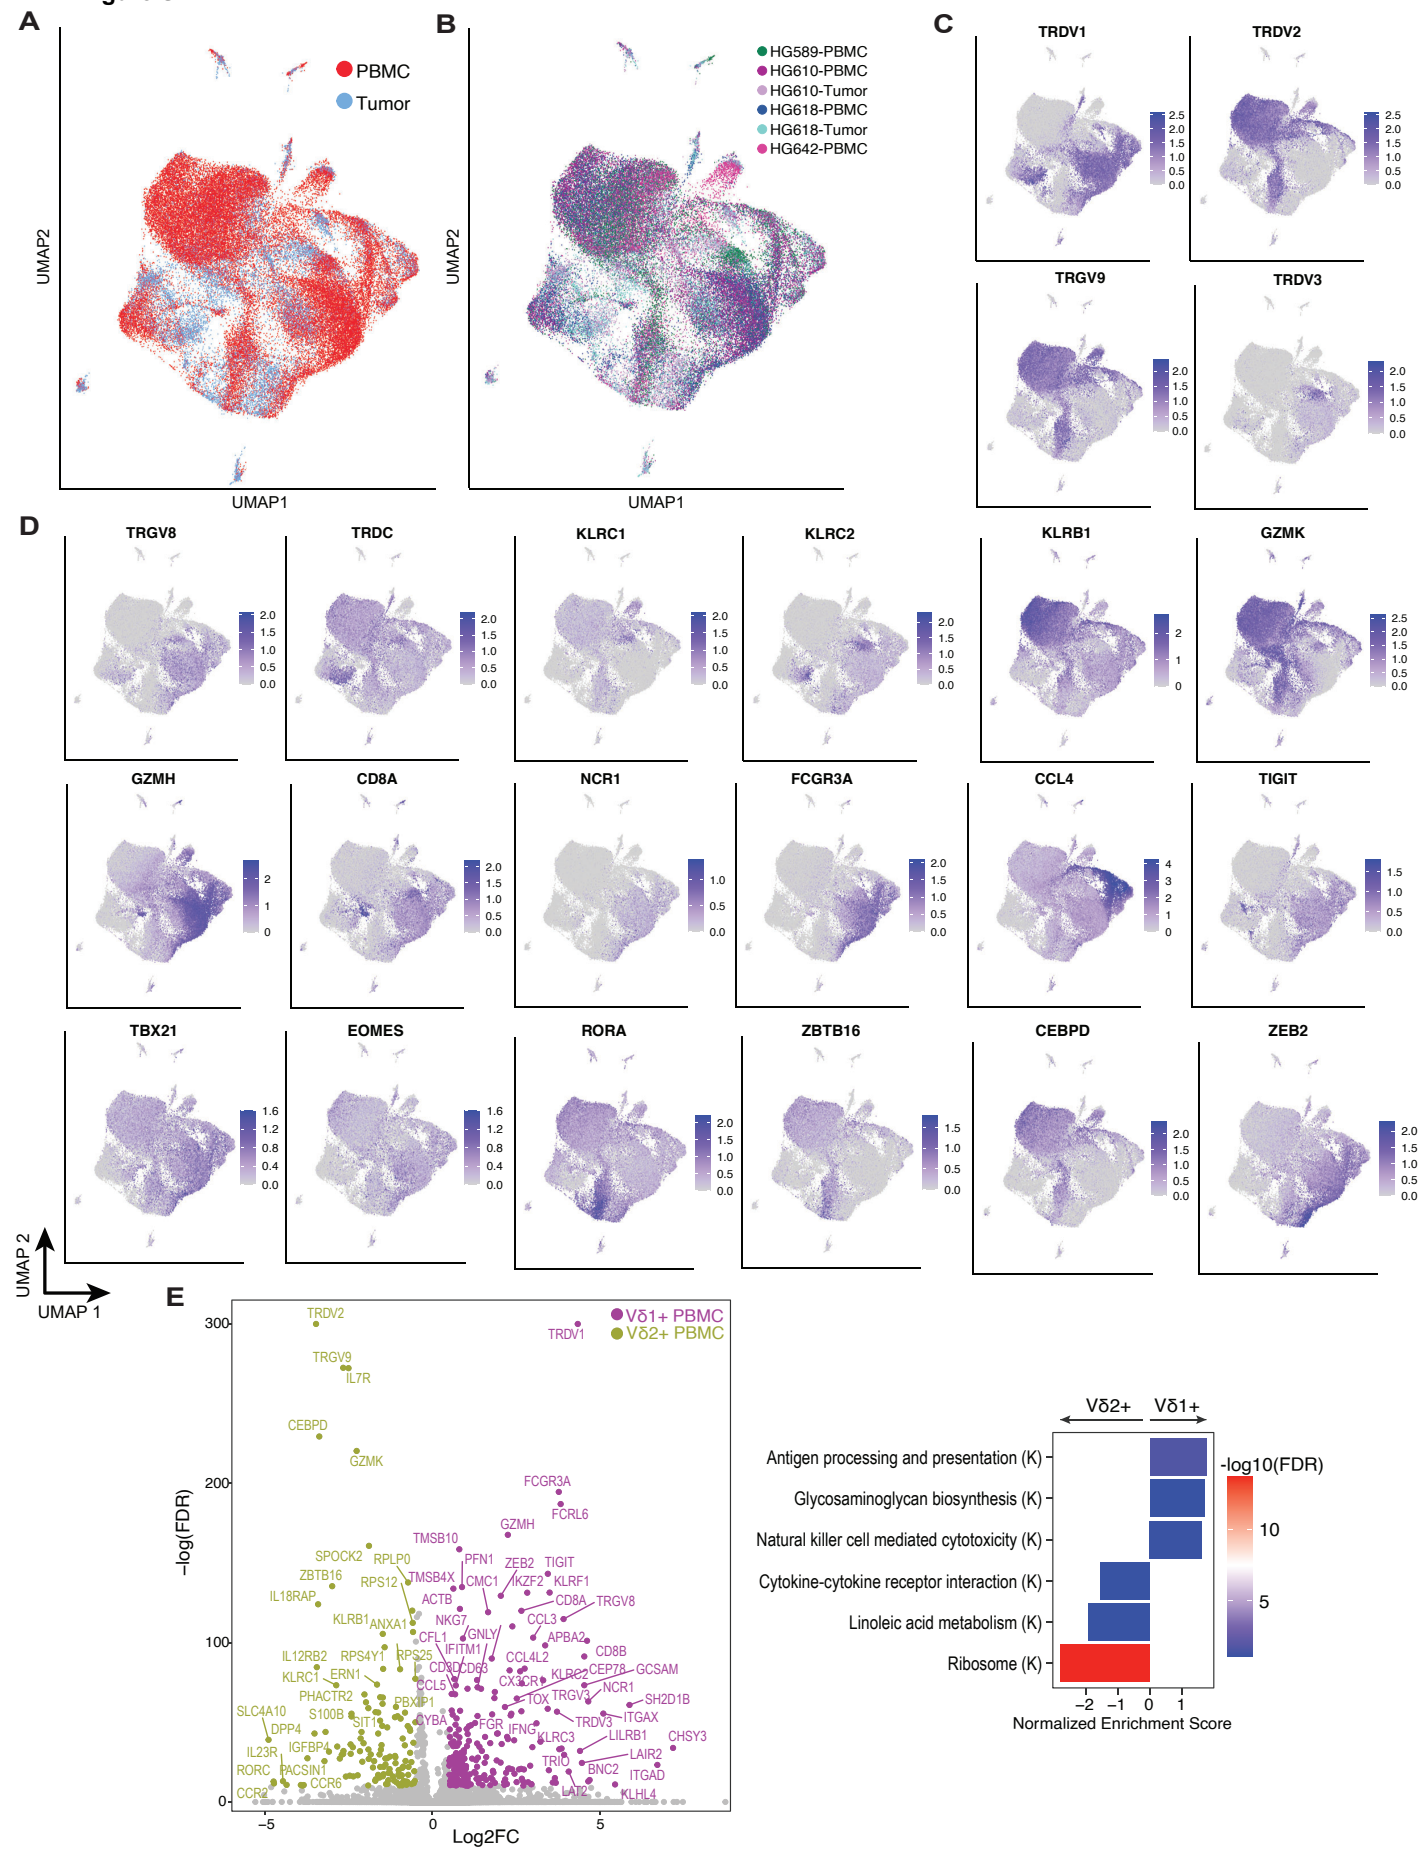

**Figure S2: Subsets, features, and pathways of  $\gamma\delta$  T cells.**  $\gamma\delta$  T cells were sorted from PBMCs and human GIST tumors and processed for 10x Genomics scRNA-seq. **A)** Integrated Uniform Manifold Approximation and Projection (UMAP) of  $\gamma\delta$  T cells colored by tissue source (PBMC or tumor) and **B)** UMAP of  $\gamma\delta$  T cells as in (A) colored by sample. **C)** Integrated UMAP plots colored by normalized expression of key marker genes used to delineate cell type populations or **D)** normalized expression of representative immune response genes and transcription factors. **E) left,** Volcano plot of differentially expressed genes between V $\delta$ 1 and V $\delta$ 2 cells within PBMC samples. **right,** Gene set enrichment analysis (GSEA) of differentially expressed pathways between V $\delta$ 1 and V $\delta$ 2 cells within PBMC samples. Hallmark (H) and KEGG (K) pathways are indicated in parentheses. Significant pathways (FDR<0.1) are shown. FDR, false discovery rate; NES, normalized enrichment score.

Figure S3

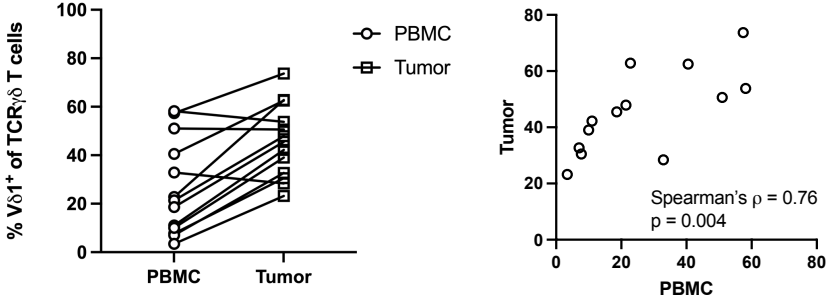

**Figure S3: Frequency and correlation of Vδ1 in matched PBMCs and tumors.** Frequency of Vδ1  $\gamma\delta$  T cells was determined by flow cytometry (left), and Spearman's correlation was analyzed in matched PBMCs and tumors isolated from GIST patients (right), n=13. Spearman's  $\rho = 0.76$ , \* $P = 0.004$ .

Figure S4

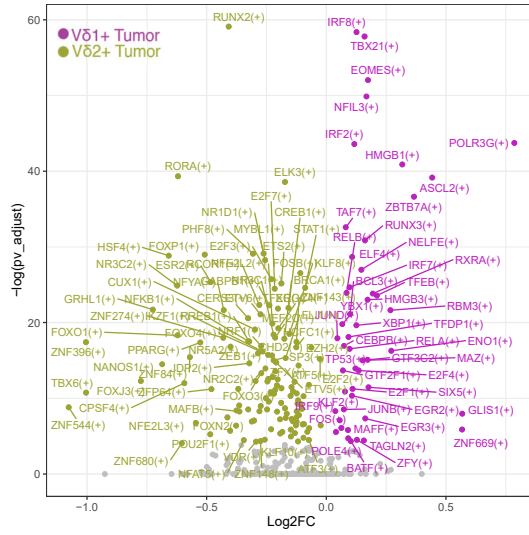

Figure S4: Transcriptional regulons of  $\gamma\delta$  T cells.  $\gamma\delta$  T cells were sorted from human PBMCs and GISTs and processed for 10x Genomics scRNA-seq. Differential transcriptional regulons as inferred by SCENIC are shown by volcano plot between tumor V $\delta$ 1 and V $\delta$ 2 cells.

Figure S5

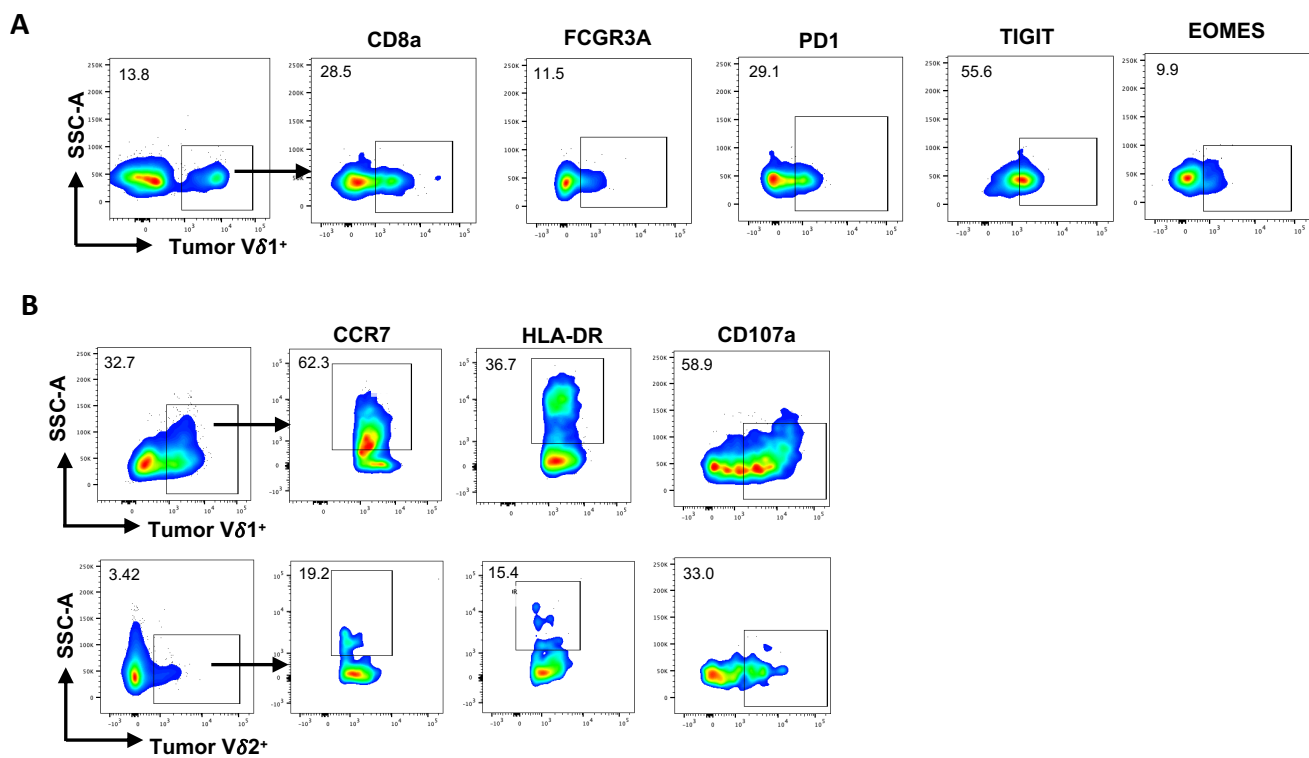

**Figure S5: Tumor-infiltrating  $V\delta 1$  T cells have distinct function.** Tumor single cell suspensions were isolated from untreated GIST patients. **A)** Representative flow plots of selected markers in tumor  $V\delta 1$  T cells ( $n=10$ ). **B)** Representative flow plots showing selected marker expression in tumor  $V\delta 1$  T cells versus tumor  $V\delta 2$  T cells.

Figure S6

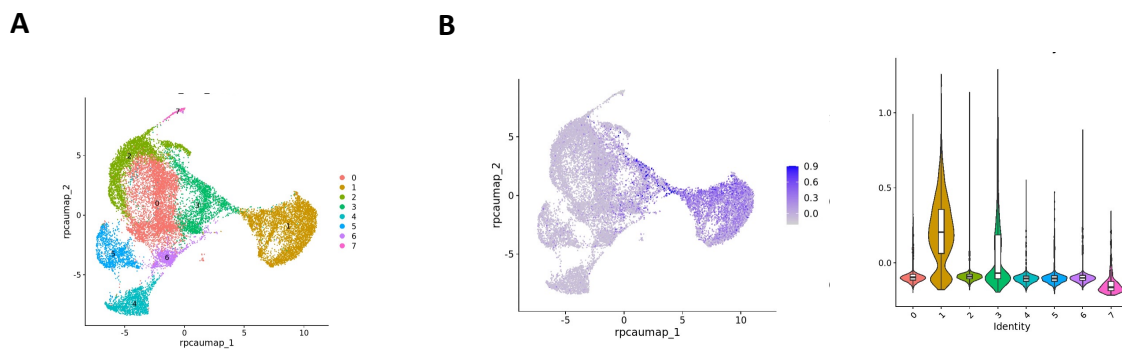

**Figure S6: UMAP and subsets of  $\gamma\delta$  T cells in human GIST tumor scRNA-seq.** Human GIST tumor specimens were processed for 10x Genomics scRNA-seq. **A)** UMAP of integrated T cells (n=19,453) identified in scRNA-seq data from untreated (n=3) and resistant (n=2) human GISTs.  $\gamma\delta$  T cells (n = 6,970 cells) were annotated based on canonical  $\gamma\delta$  T gene expression (TRDC, TRDV1, TRDV2, TRDV3. **B) left,**  $\gamma\delta$  T cell module score projected onto UMAP; **right,** Violin plot of  $\gamma\delta$  T cell module by cluster, identifying enrichment in clusters 1 and 3.

Figure S7

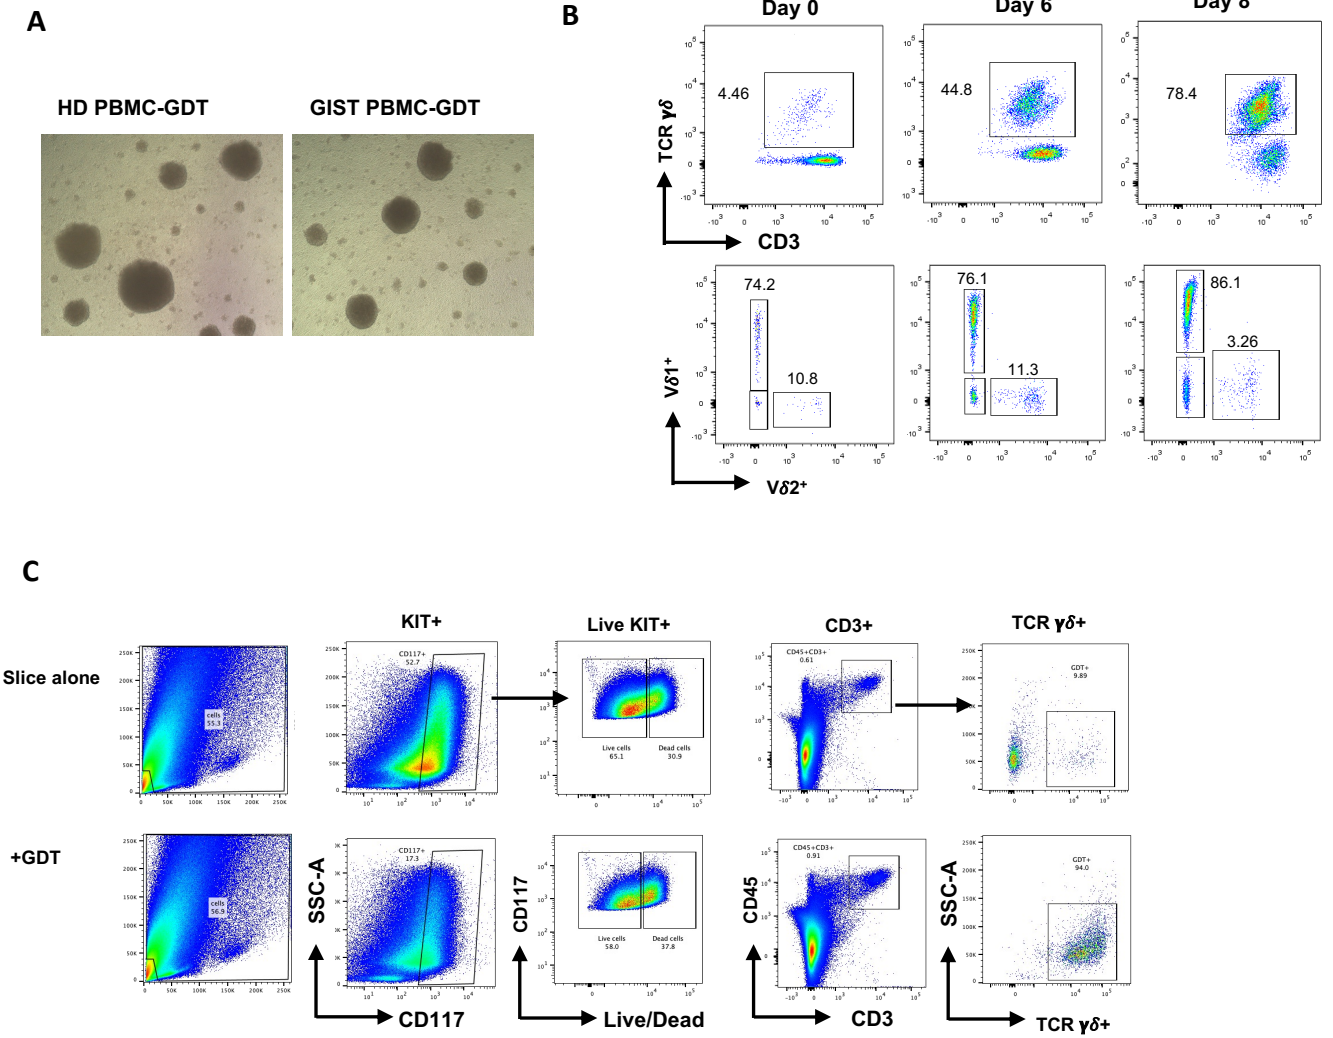

**Figure S7: Expansion of  $\gamma\delta$  T cells (GDT) from PBMCs and cytotoxicity assays in human GIST tissue slices. A)** Representative pictures showing  $\gamma\delta$  T cell expansion on day 6.  $\gamma\delta$  T cells from PBMCs of 4 healthy donors (HD) and from 3 untreated GISTs were expanded with an anti- $\gamma\delta$  TCR antibody supplemented with IL-2 (200IU/ml). **B)** Representative flow plots illustrating the time course of  $\gamma\delta$  T expansion from PBMCs in a healthy donor. **C)** Gating strategy used to identify KIT<sup>+</sup> tumor cells and  $\gamma\delta$  T cells in human GIST tissue slices co-cultured with expanded  $\gamma\delta$  T cells from a healthy donor at an E:T ratio of 5:1 for 24 hours *in vitro*.

Figure S8

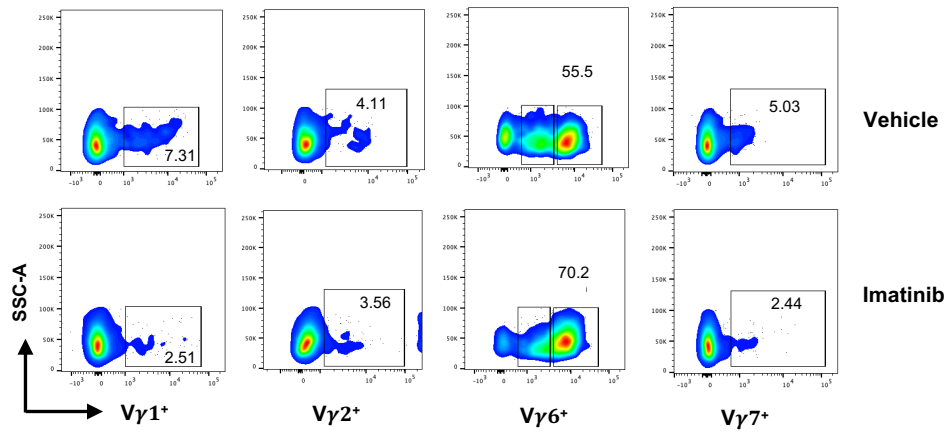

**Figure S8: Imatinib changes  $\gamma\delta$  T cell subsets in  $Kit^{V558del/+}$  tumors.** Representative flow plots and frequency of V $\gamma$ 1, V $\gamma$ 2, V $\gamma$ 6, and V $\gamma$ 7 among tumor  $\gamma\delta$  T cells from  $Kit^{V558del/+}$  mice treated with imatinib at 1 week. n=4-5/group.

**Supplementary Table S1: Specific gene module and signature gene list for  $\gamma\delta$  T-cell clusters**

| <b>Subtype Annotation</b>                        | <b>Gene Markers</b>                                                                                                                                                                                                                                     |
|--------------------------------------------------|---------------------------------------------------------------------------------------------------------------------------------------------------------------------------------------------------------------------------------------------------------|
| <b>V<math>\delta</math>1+-CTL response1/ 2</b>   | TRDV1, TRDV3, TRGV8, TRGV3,FCGR3A, NCR1, CD244, FCRL6, CD8A, CD63, CX3CR1, HLA-DRB1, GZMH, NKG7, KLRD1, KLRK1, KIR2DL1, KIR3DL1, KIR3DL3, KIR3DL4, CD101 (IGSF2), CD52, PDCD1, IFNG                                                                     |
| <b>V<math>\delta</math>1+-Naive</b>              | TRDV1, TRGV2, CD27, TCF7, LEF1, LTB, XCL1, ZNF683, CCR7, MAL, ANK1, SOX4, CXCR3, KLR2, IGFBP2                                                                                                                                                           |
| <b>V<math>\delta</math>1+-Inflammatory like</b>  | TRDV1, TRGV8, TRGV5, FCGR3A, NCR1, CD244, FCRL6, CX3CR1, CD69, KLRK1 (NKG2D), KLRD1, KLR2, BTN3A1, IL2RB, TBX21, EOMES, IKZF2, ZEB2, RORA, RUNX1, HAVCR2 (TIM3), TNFRSF9, IFNG, SLAMF6, AOH, PRKCH, PIK3AP1, TIGIT, ITGAD, LYN                          |
| <b>V<math>\delta</math>1+- Innate Activation</b> | TRDV1, TRGV2, CXCR3, CD63, KLR3, NCR1, CD8A, IL2RB, ZNF683, XCL1, IFNG, IFNG-AS1, HSPA1A, TUBA1A                                                                                                                                                        |
| <b>V<math>\delta</math>1+- Differentiation</b>   | TRDV1, TRGV2, TRGV10, CXCR3, CCR7, TIGIT, PDCD1, EOMES, TCF7, MAL, SBK2, GZMK                                                                                                                                                                           |
| <b>V<math>\delta</math>1+- Proliferating</b>     | MKI67 (Ki67), CDK1, CCNA2, CDC20, AURKB, STMN1, ENTPD1 (CD39), CD1a, PDCD1LG, CXCR3, HLA-DRB1                                                                                                                                                           |
| <b>V<math>\delta</math>3+</b>                    | TRDV3, TRGV4, TRGV8, CD8A, GZMH, GNLY, KLR2, TBX21, TYROBP, ZNF683, XCL1, KIR2DL1, KIR3DL3, KIR2DL4, CD101 (IGSF2), CD52                                                                                                                                |
| <b>V<math>\delta</math>2+-CTL response</b>       | TRDV2, TRGV9, CEBPD, KLRB1, GZMK, KLR1, IL7R, IL23R, ANXA1, ZBTB16, RORC, IGFBP4, S100B, TNFRSF25, CCR6, CXCR6, IL12RB2, IL18RAP, NR1D1                                                                                                                 |
| <b>V<math>\delta</math>2+-Type 3 immunity</b>    | TRDV2, TRGV9, RORA, IL7R, IL23R, BTN3A1, DPP4, CCR6, CD44, CD69, CXCR6, AREG,IFNGR1, IL17RA, CAMK4, THEMIS, ZBTB16, SYNE2, CCR7, CDC14A, ANK3, DUSP16, RUNX1, IFNG-AS1, KLR1, IL12RB1, ITGA1 (CD49a), KLRG1, SLAMF6, NFATC2, IL18RAP, CD28, IGSF9B, MAF |
| <b>V<math>\delta</math>2+-Naïve</b>              | TRDV2, TRGV9, TRGV10, GNLY, KLR1, IL7R, GPR27, HOXB6, SELL, S100B                                                                                                                                                                                       |
| <b>V<math>\delta</math>2+-Differentiation</b>    | TRDV2, TRGV9, SELL, CCL4, TNF, S100B                                                                                                                                                                                                                    |

**Supplementary Table S2: Immune score markers for memory, exhaustion, activation and cytotoxicity by using ImmuneSigDB or other published studies**

| <b>Immune Profile</b>      | <b>Gene Markers</b>                                  |
|----------------------------|------------------------------------------------------|
| <b>Memory Score</b>        | IL7R, CCR7, ZNF683, TCF7, LEF1, CXCR3                |
| <b>Exhaustion Score</b>    | PDCD1, HAVCR2, TIGIT, LAG3, CD244, CD160             |
| <b>Proliferation Score</b> | MKI67, STMN1, TYMS, TOP2A, PCNA, CD74                |
| <b>Activation Score</b>    | IL2RB, IL2RA, HLA-DRA, HLA-DRB, CD27, CD226, TNFRSF9 |
| <b>Cytotoxicity Score</b>  | GZMH, NKG7, KLRD1, GNLY, PRF1                        |

**Additional supporting data files in this study:**

1. Data file s1: All patient cohort information used in this study (GDT\_Patient\_data\_file\_s1)
2. Data file s2: Differentially expressed genes between  $\gamma\delta$  T cells in untreated (n=3) and resistant (n=2) GISTs based on scRNA-seq data (GDT\_untx\_v\_res\_DEG\_data\_file\_s3)
3. Data file s3: Over representation enrichment analysis between  $\gamma\delta$  T cells in untreated (n=3) and resistant (n=2) GISTs based on scRNA-seq data (GDT\_ORA\_analysis\_data\_file\_s2)
4. Data file s4: All supporting data for figures (Figure\_Supporting\_Data\_file\_s4)
